# Supplementary material for: Quantitative Evaluation of the Mitochondrial Proteomes of Drosophila melanogaster Adapted to Extreme Oxygen Conditions
Source: PLoS One. 2013 Sep 12;8(9):e74011. doi: 10.1371/journal.pone.0074011 (PMC3771901; doi:10.1371/journal.pone.0074011)
Supplement: Table S10 — List of proteins in TCA cycle, Respiratory Chain Complexes and ATP synthase identified by iTRAQ analysis. (XLSX) [file pone.0074011.s011.xlsx]

## Sheet: Sheet1
Table S10. List of proteins in TCA cycle, Respiratory Chain Complexes and ATP synthase identified by iTRAQ analysis.
		Respiratory Chain Complexes								proton-transporting ATP synthase
TCA cycle		Complex I		Complex II		Complex III		Complex IV		Coupling Factor F(o)		Catalytic Core F(1)
LOF	HOF	LOF	HOF	LOF	HOF	LOF	HOF	LOF	HOF	LOF	HOF	LOF	HOF
CG3861	CG3861	CG1970	CG1970	CG5718	CG5718	CG3560	CG3560	CG9603	CG9603	CG8189	CG8189	CG4412	CG4412
CG14740	CG14740	CG2014	CG2014	CG6629	CG6629	CG3731	CG3731	CG10396	CG10396	CG4412	CG4412	CG11154	CG11154
CG4706	CG4706	CG3192	CG3192	CG7349	CG7349	CG4169	CG4169	CG11043	CG11043	CG6030	CG6030	CG7610	CG7610
CG9244	CG9244	CG3214	CG3214	CG10219	CG10219	CG4769	CG4769	CG14077	CG14077	CG1746	CG1746	CG3612	CG3612
Idh	Idh	CG3446	CG3446	CG17246	CG17246	CG7580	CG7580	CG18193	CG18193	CG3321	CG3321	CG5389	CG5389
CG6439	CG6439	CG3621	CG3621	CG3283	CG3283	CG14482	CG14482	CG18809	CG18809	CG4692	CG4692	CG31477	CG31477
CG12233	CG12233	CG3683	CG3683	CG6666	CG6666	CG14508	CG14508	CG30093	CG30093	CG7211	CG7211	CG2968	CG2968
CG5028	CG5028	CG5548	CG5548			CG17856	CG17856	CG10664	CG10664	CG7813	CG7813	CG4307	CG4307
CG11661	CG11661	CG5703	CG5703			CG30354	CG30354	CG14724	CG14724	CG10731	CG10731	CG9032	CG9032
CG33791	CG33791	CG6020	CG6020			CG34090	CG34090	CG11015	CG11015	CG12027	CG12027
CG5214	CG5214	CG6463	CG6463			CG8764	CG8764	CG14235	CG14235	CG17300	CG17300
CG5599	CG5599	CG6485	CG6485			CG7361	CG7361	CG2249	CG2249	CG6105	CG6105
CG7430	CG7430	CG6914	CG6914			CG41623	CG41623	CG7181	CG7181	CG34073	CG34073
CG1065	CG1065	CG7598	CG7598					CG14028	CG14028	CG34072	CG34072
CG10622	CG10622	CG7712	CG7712					CG17280	CG17280
CG11963	CG11963	CG8102	CG8102					CG34067	CG34067
CG10219	CG10219	CG8680	CG8680					CG34069	CG34069
CG5718	CG5718	CG9140	CG9140					CG34074	CG34074
SdhB	SdhB	CG9172	CG9172
CG6666	CG6666	CG9306	CG9306
CG6629	CG6629	CG10320	CG10320
CG4094	CG4094	CG11423	CG11423
CG4095	CG4095	CG11455	CG11455
CG6140	CG6140	CG11913	CG11913
CG10748	CG10748	CG12079	CG12079
CG10749	CG10749	CG12203	CG12203
CG7998	CG7998	CG12400	CG12400
		CG12859	CG12859
		CG15434	CG15434
		CG18624	CG18624
		CG32230	CG32230
		CG34439	CG34439
		CG40002	CG40002
		CG40472	CG40472
		CG13240	CG13240
		CG9762	CG9762
		CG34092	CG34092
		CG34063	CG34063
		CG34076	CG34076
		CG34085	CG34085
		CG34086	CG34086
		CG34083	CG34083
		CG34089	CG34089
		CG3944	CG3944
		CG6343	CG6343
		CG2286	CG2286
		CG6008	CG6008
		CG8844	CG8844
Orange: Identified
Green: Down-regulated
Red: Up-regulated
